# Supplementary material for: Predicting the Prognostic Value of POLI Expression in Different Cancers via a Machine Learning Approach
Source: MDPI journal article supplement (doi:10.3390/ijms23158571), 2022-08-02
Supplement: s1 [file s1]

# Supplementary Material

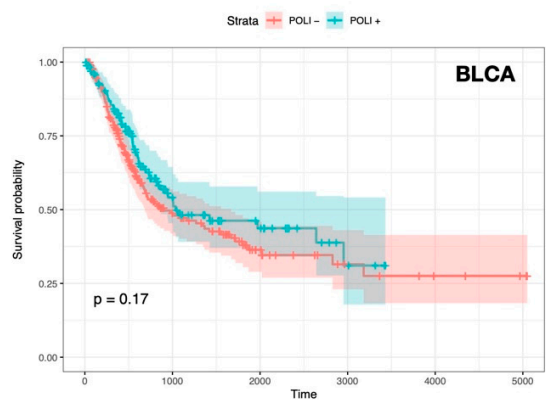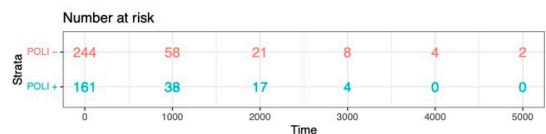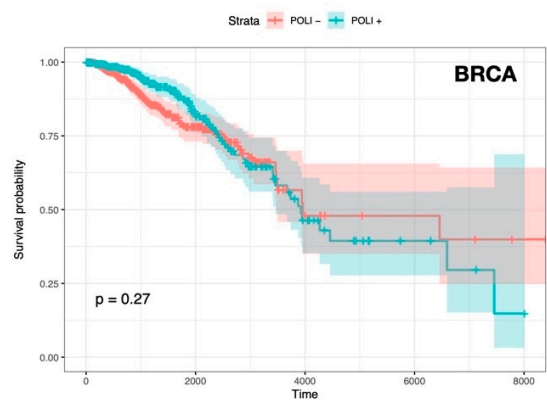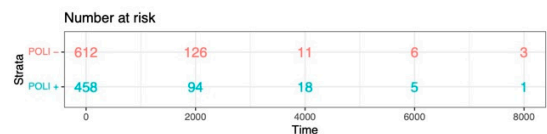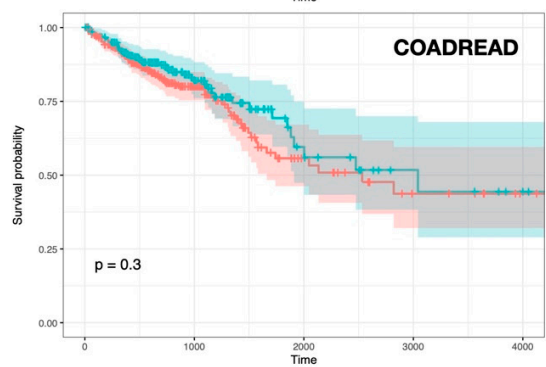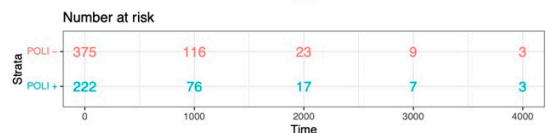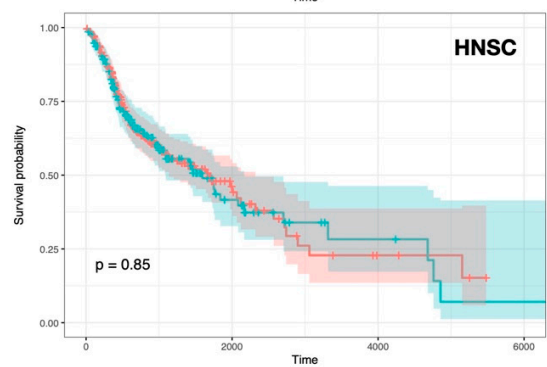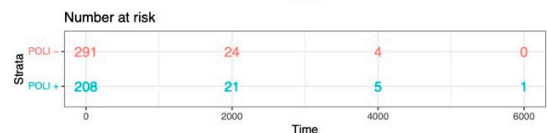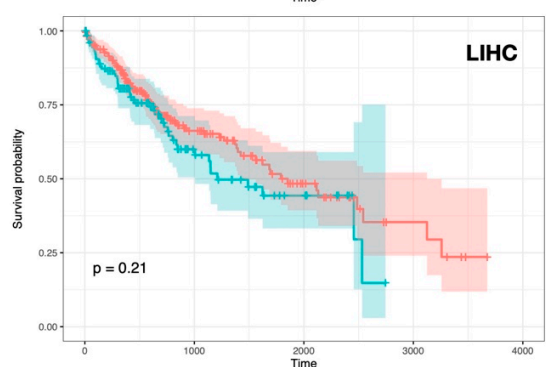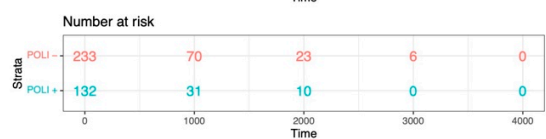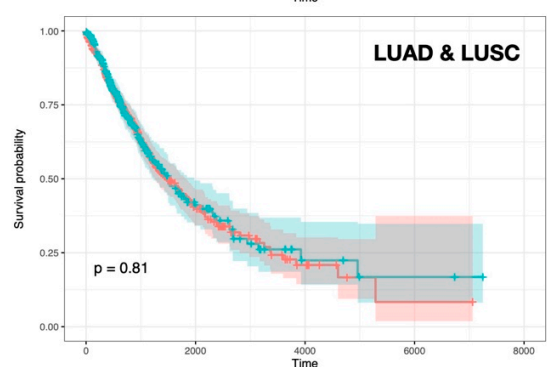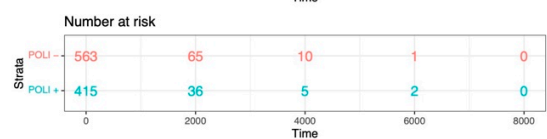

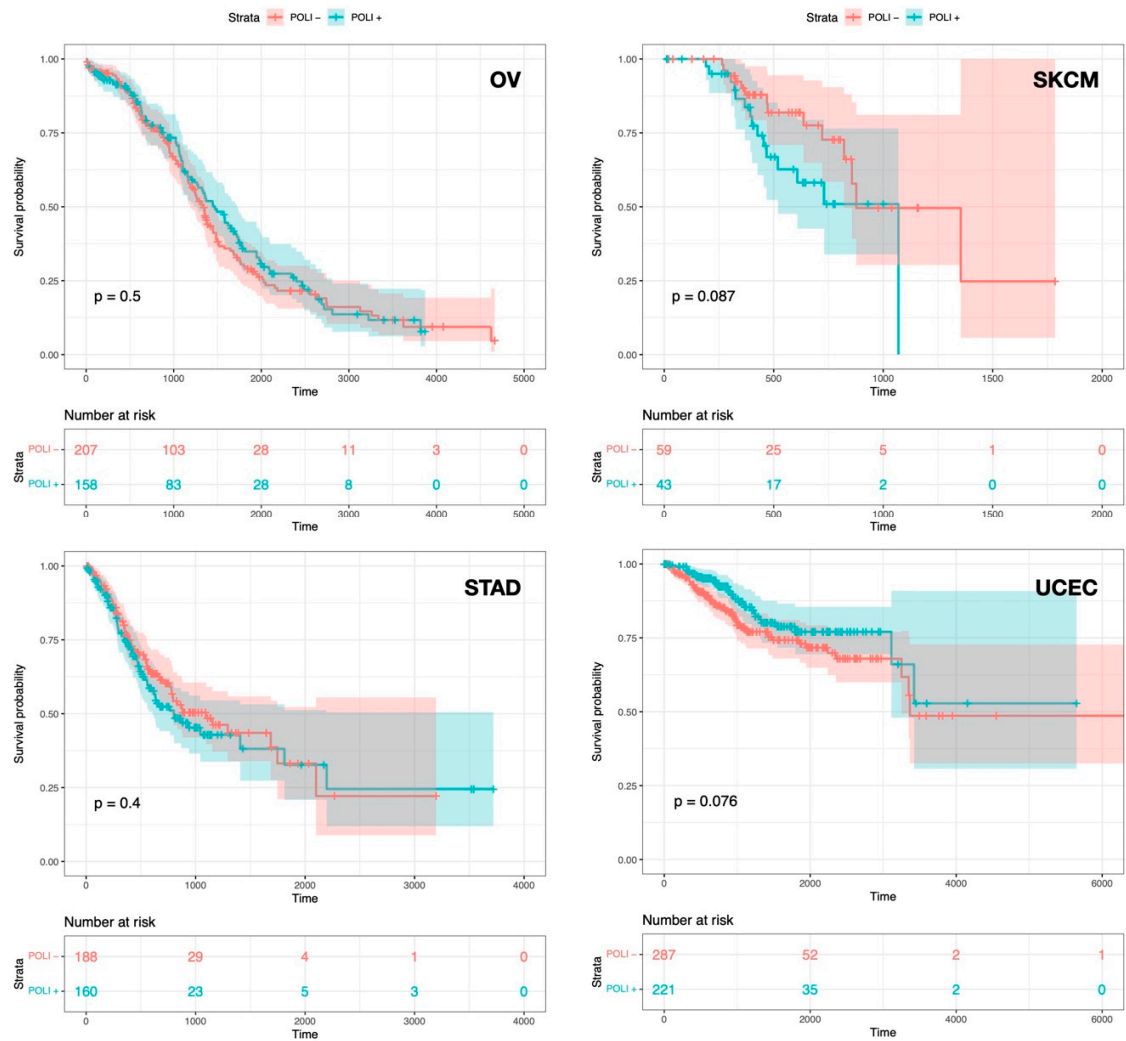

**Figure S1.** Prognostic value of POLI in BLCA, BRAC, COADREAD, HNSC, LIHC, LUAD & LUSC, OV, SKCM, STAD, and UCEC.

The correlation between genes and POLI were calculated again using Spearman's rank correlation. In Table S2, the ranges of Spearman correlation coefficient were slightly different from values in Table 1 via Pearson correlation. The exact analytical procedure was executed using data based on Spearman correlation. Results from Pearson correlation yielded smaller  $p$ -values when selected same subtypes in Group 1 and Group 2 compared with Spearman correlation.

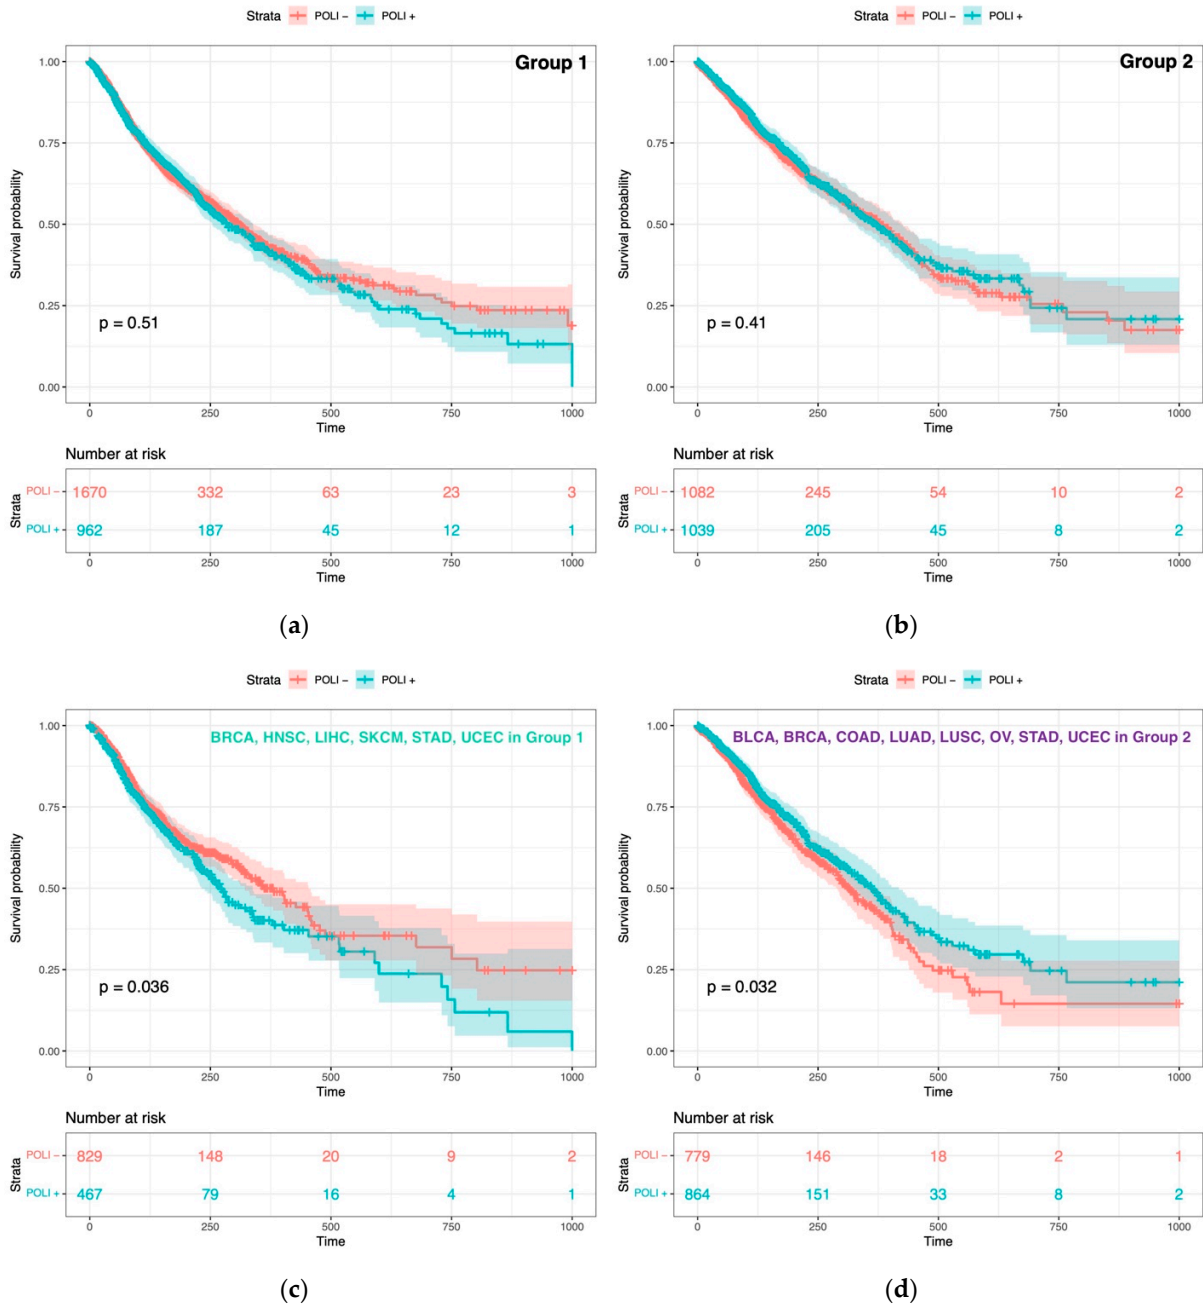

**Figure S2.** Reoccurrence of the prognostic value of POLI expression via Spearman correlation: (a) K-M plot of POLI expression for patients in Group 1; (b) K-M plot of POLI expression for patients in Group 2; (c) K-M plot of POLI expression for patients in BRAC, HNSC, LIHC, SKCM, STAD, and UCEC from Group 1; (d) K-M plot of POLI expression for patients in BLCA, BRCA, COADREAD, LUAD, LUSC, OV, STAD, and UCEC from Group 2.

Gradient Boosting (GB) and Neural networks (NN) were applied to data via Pearson correlation using the identical setting from RFC in this study (Figures S4 and S5). Either method yielded larger p-value compared to the results using Random Forest Classifier in Figure 2. NN model was implemented in TensorFlow with four layers and half data drop out in each layer. The accuracy of predicting CESC and PAAD in testing dataset was 98%. Gradient boosting classifier was implemented in *scikit-learn* module with 100 estimators and 0.5 learning rate. The accuracy of predicting CESC and PAAD in testing dataset was 100%. Similarly, but less successfully, two other classifiers were roughly clustered patients with POLI as a negative prognostic factor in Group 1 or a positive prognostic factor in Group 2.

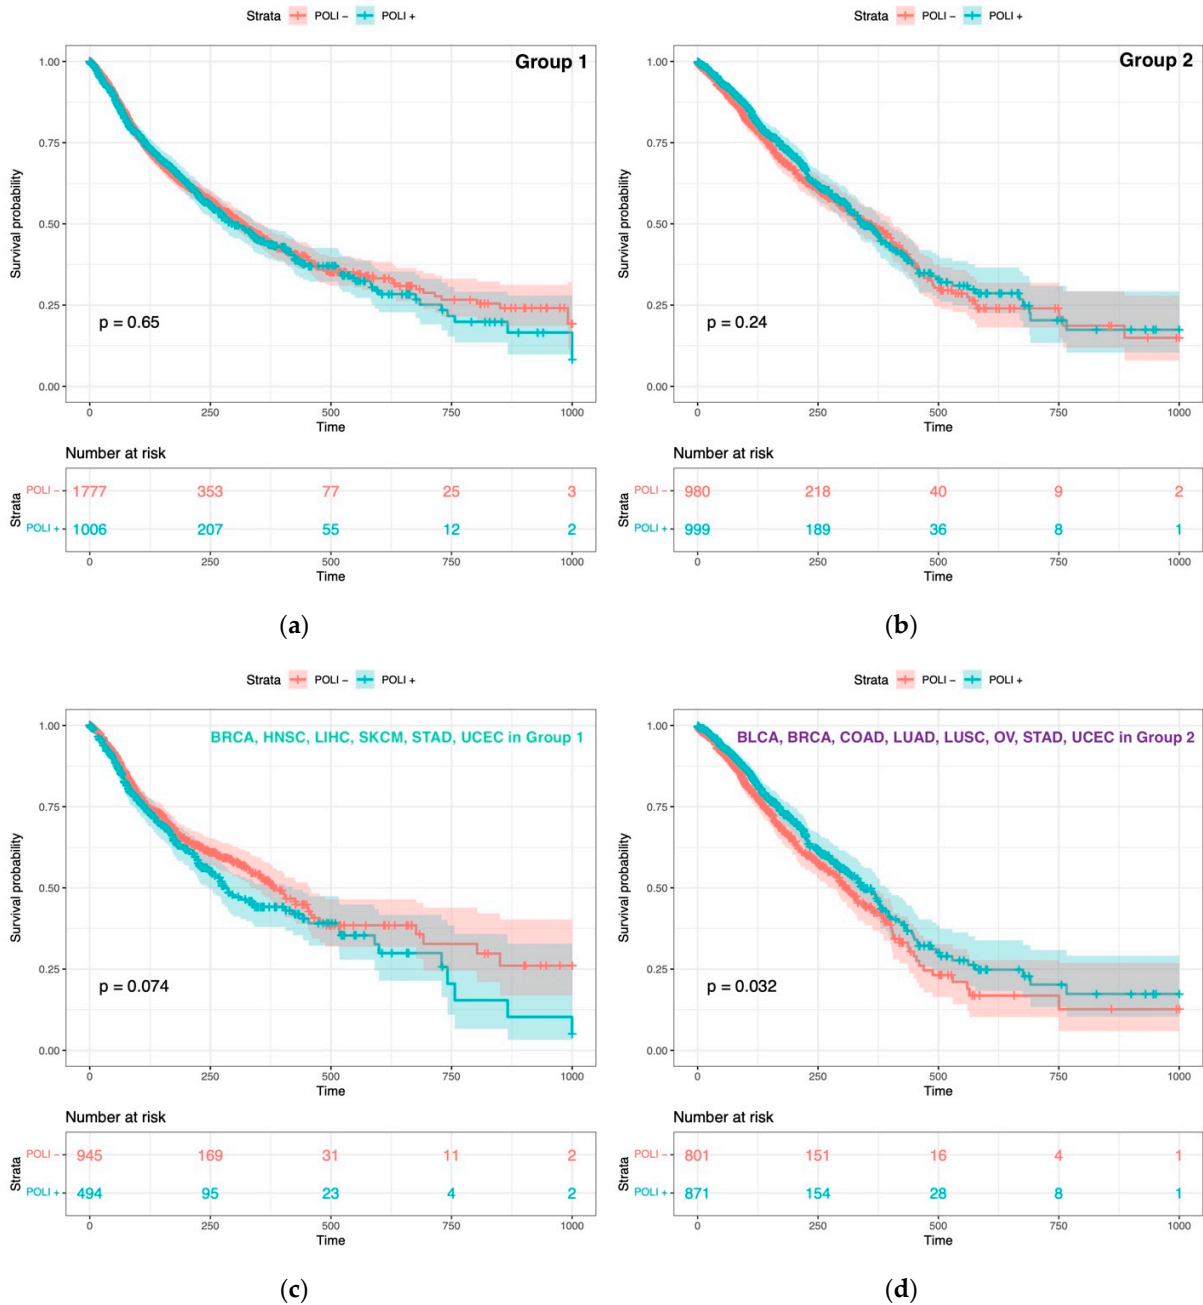

**Figure S3.** The prognostic value of POLI expression in Group 1 and Group 2 via gradient boosting classifier: (a) K-M plot of POLI expression for patients in Group 1; (b) K-M plot of POLI expression for patients in Group 2; (c) K-M plot of POLI expression for patients in BRAC, HNSC, LIHC, SKCM, STAD, and UCEC from Group 1; (d) K-M plot of POLI expression for patients in BLCA, BRAC, COADREAD, LUAD, LUSC, OV, STAD, and UCEC from Group 2.

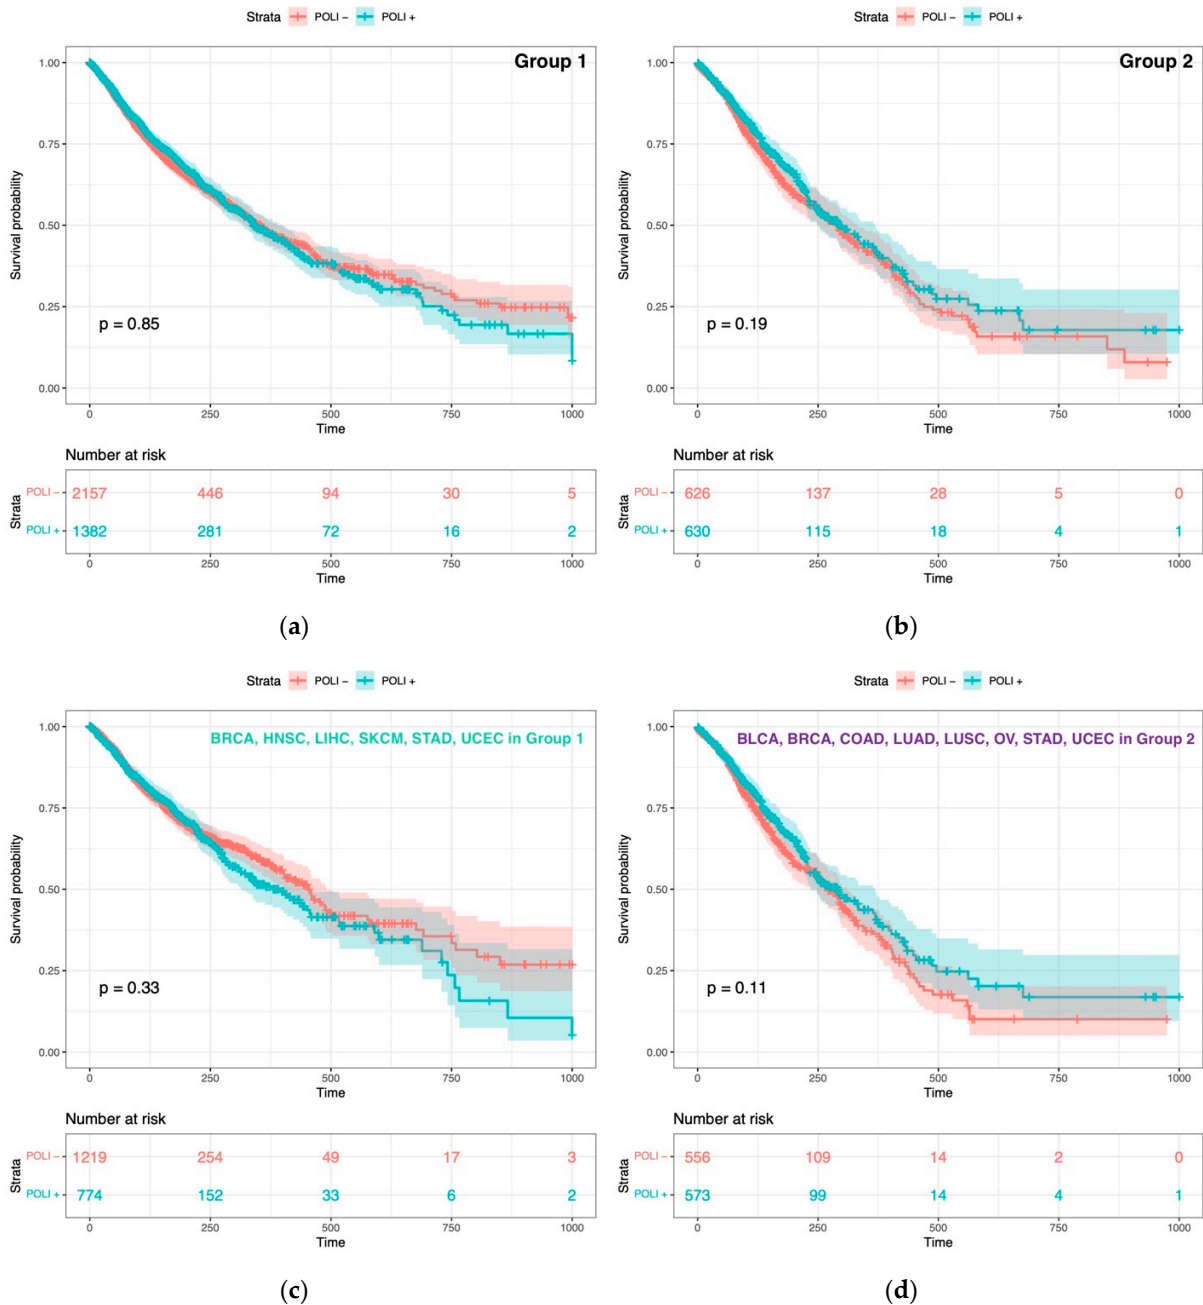

**Figure S4.** The prognostic value of POLI expression in Group 1 and Group 2 via NN classifier: (a) K-M plot of POLI expression for patients in Group 1; (b) K-M plot of POLI expression for patients in Group 2; (c) K-M plot of POLI expression for patients in BRAC, HNSC, LIHC, SKCM, STAD, and UCEC from Group 1; (d) K-M plot of POLI expression for patients in BLCA, BRAC, COADREAD, LUAD, LUSC, OV, STAD, and UCEC from Group 2.

The importance of gene variables was provided in RFM. Top 100 genes were re-processed via GLASSO to reduce the size to 25 highly associated genes using gene-gene correlation matrix of CESC and PAAD, respectively. Six genes (CLPP, EDF1, RPL28, RPS15, SF3B5 and SURF2) existed in both cancer types. 25 genes formed five to six clusters in CESC or PAAD that indicates gene-gene interaction conditioning on POLI expression and potential factors regulating POLI expression (Figure 3).

In CESC, AURKAIP1 was associated to 11 genes forming an isolated cluster consisting of 13 genes. Other independent clusters contained 2 to 3 highly associated genes. In PAAD, three genes including RPS15, CLPP, and NDUFB11 were all associated to five genes, however, all of them came from the same cluster with ten genes.

CLPP, EDF1, RPL28, RPS15, SF3B5, and SURF2 were existed in CESC and PAAD regarding top 25 highly associated genes.

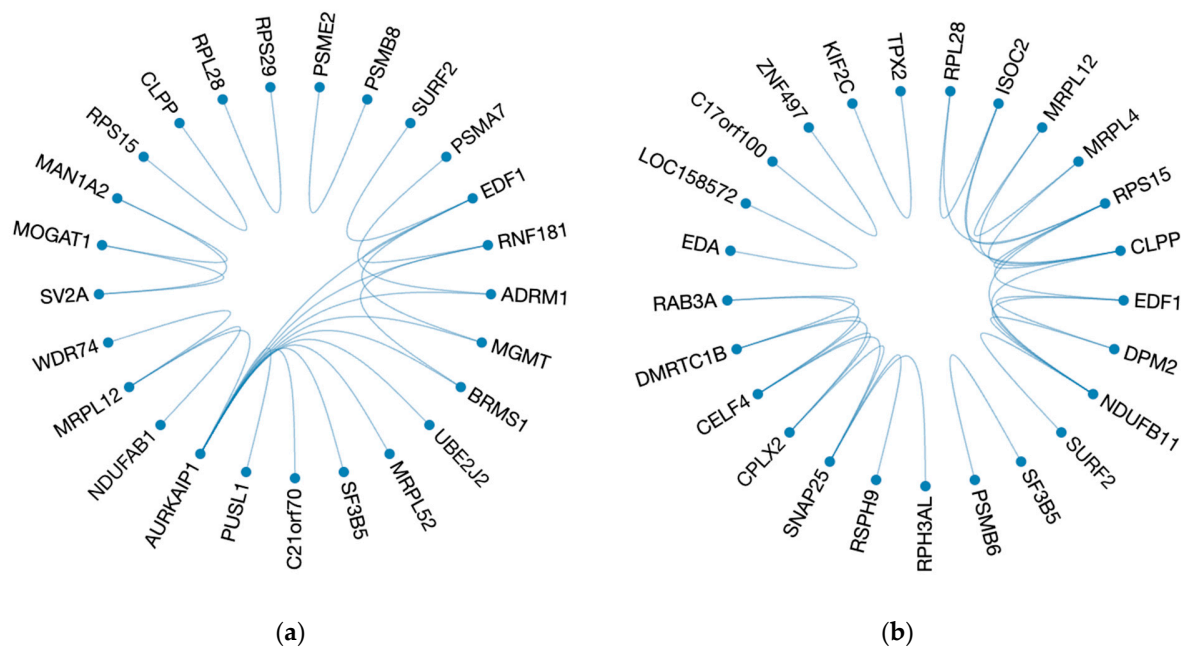

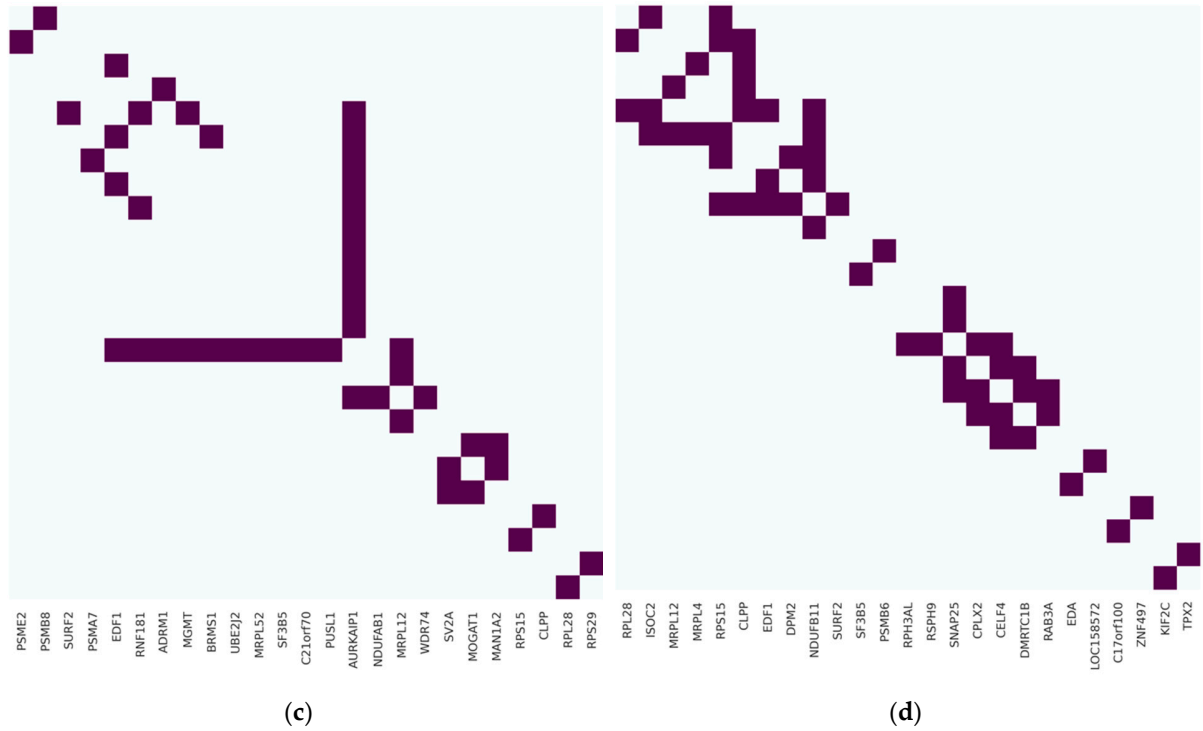

**Figure S5.** Visualization for most correlated genes regarding POLI expression in network and heatmap layouts: (a) Circosplot for 25 most POLI-related genes from 100 genes returned by RFC in CESC; (b) Circosplot for 25 most POLI-related genes from 100 genes returned by RFC in PAAD; (c) heatmap layout of 25 genes in (a); (d) heatmap layout of 25 genes in (b).

**Table S1.** POLI vs other gene correlation ranges in CESC and PAAD using Spearman's rank correlation.

| Caner | Top 500 Positive   |       | Top 500 Negative |        |
|-------|--------------------|-------|------------------|--------|
|       | Max                | Min   | Min              | Max    |
| CESC  | 0.518 <sup>1</sup> | 0.304 | -0.409           | -0.242 |
| PAAD  | 0.792              | 0.486 | -0.629           | -0.402 |

<sup>1</sup> Each value indicates the Spearman's rank correlation coefficient between POLI and another gene.

**Table S2.** Top 100 genes assessed by RFC for the classification training task of differentiating CESC and PAAD patients.

| Gene   | Importance | Gene    | Importance |
|--------|------------|---------|------------|
| PSMB8  | 0.06316943 | DMRTC1B | 0.0037518  |
| PSMA7  | 0.05032968 | ZNF497  | 0.00339815 |
| UBE2S  | 0.04979548 | NAP1L3  | 0.00297679 |
| RNF181 | 0.04128673 | CCNB2   | 0.002361   |
| MRPL4  | 0.04051191 | ECE2    | 0.00233863 |



|           |            |           |            |
|-----------|------------|-----------|------------|
| MRPL14    | 0.03439445 | NSUN5     | 0.00193941 |
| FSIP1     | 0.03284802 | IKZF4     | 0.00174226 |
| MRPL17    | 0.02735727 | DPM2      | 0.00171191 |
| MOGAT1    | 0.02650861 | IFI27     | 0.00170035 |
| PSMB6     | 0.02531586 | RGPD4     | 0.00166636 |
| C5        | 0.02514696 | TECTA     | 0.00151018 |
| ZNF441    | 0.02483958 | C17orf100 | 0.00149179 |
| DTX3      | 0.02440788 | RAB3A     | 0.00136568 |
| RSPH9     | 0.02428636 | MRPL37    | 0.00129391 |
| WDR74     | 0.02252129 | ZNF25     | 0.00128354 |
| PCDHA2    | 0.0212011  | TPX2      | 0.0012455  |
| TMEM149   | 0.02046246 | PCDHA3    | 0.00119688 |
| AGAP4     | 0.02022953 | LYPLA2P1  | 0.00117035 |
| LOC284440 | 0.01957489 | SALL2     | 0.0011319  |
| SURF2     | 0.01844377 | KIAA0319  | 0.0011106  |
| CLPP      | 0.01762643 | GOLGA6L5  | 0.00109381 |
| RPS29     | 0.01727722 | NDUFAB1   | 0.00108598 |
| KRT8      | 0.01662942 | CENPF     | 0.00105923 |
| DNAH7     | 0.01639963 | WDR17     | 0.00105264 |
| PRELID1   | 0.01596565 | POLD2     | 0.00103434 |
| PUSL1     | 0.01523146 | SPATA4    | 0.00101323 |
| MRPL12    | 0.01505887 | RGS4      | 0.00100629 |
| CPLX2     | 0.01486688 | MAGI2     | 0.00098264 |
| AP2S1     | 0.01414428 | PMPCA     | 0.00095689 |
| LOC158572 | 0.01374755 | MX1       | 0.00095484 |
| PSME2     | 0.01168913 | TIGD4     | 0.00093922 |
| ISOC2     | 0.00970972 | RPS15     | 0.00092699 |
| GPKOW     | 0.00928349 | KIF15     | 0.00091967 |
| C21orf70  | 0.00873391 | MGMT      | 0.00091269 |
| BST2      | 0.00850269 | KIF2C     | 0.00091158 |
| KIAA1109  | 0.00719654 | HMGA1     | 0.00089834 |
| KIF20A    | 0.00685156 | MRPL52    | 0.00089205 |
| SDHAF2    | 0.00653688 | NDUFB11   | 0.0008833  |
| BRMS1     | 0.00630161 | RPH3AL    | 0.00080189 |
| LOC653501 | 0.00623308 | ANXA2P2   | 0.0008009  |
| ZNF132    | 0.00555305 | CELF4     | 0.00077638 |
| SPTB      | 0.00537147 | EDA       | 0.00071937 |
| PGAM2     | 0.00505307 | AURKAIP1  | 0.00071874 |
| EDF1      | 0.00483283 | GJB5      | 0.00069368 |
| SF3B5     | 0.00471939 | UBE2J2    | 0.00069125 |
| UQCRC1    | 0.0047081  | SNAP25    | 0.00068137 |
| ZWINT     | 0.00468075 | TGIF2LY   | 0.00067734 |
| MAN1A2    | 0.00411337 | SV2A      | 0.00065265 |
| CTXN2     | 0.00390633 | RPL28     | 0.00064673 |
